# Supplementary material for: Zebrafish C-reactive protein isoforms inhibit SVCV replication by blocking autophagy through interactions with cell membrane cholesterol
Source: PubMed Central journal article supplement (PMC6969114; doi:10.1038/s41598-020-57501-0), 2020-01-17
Supplement: 41598_2020_57501_MOESM1_ESM.pdf [file 41598_2020_57501_MOESM1_ESM.pdf]

## **Supplementary Information**

### **Zebrafish C-reactive protein isoforms inhibit SVCV replication by blocking autophagy through interactions with cell membrane cholesterol**

Melissa Bello-Perez, Patricia Pereiro, Julio Coll, Beatriz Novoa, Luis Perez and Alberto Falco

<sup>1</sup> Instituto de Investigación, Desarrollo e Innovación en Biotecnología Sanitaria de Elche (IDiBE), Miguel Hernández University (UMH), Elche, 03202, Spain.

<sup>2</sup> Instituto de Investigaciones Marinas (IIM), Consejo Superior de Investigaciones Científicas (CSIC), Vigo, 36208, Spain.

<sup>3</sup> Instituto Nacional de Investigaciones y Tecnologías Agrarias y Alimentarias (INIA), Dpto. Biotecnología, Madrid, 28040, Spain.

**Table S1. Primer sequences used for qPCR.**

| <b>Organism</b>    | <b>Gene</b>    | <b>Sequence (5' - 3')</b>                                     | <b>Accession. no.</b>                               |
|--------------------|----------------|---------------------------------------------------------------|-----------------------------------------------------|
| <i>P. promelas</i> | <i>ef1a</i>    | Fw: CTGGAGGCCAGCTCAAACAT<br>Rv: CATTTCCTCCTTACGCTCAAC         | AY643400                                            |
|                    | <i>mx</i>      | Fw: GGAGAAGAGGTTAAATGTGGATCAG<br>Rv: TGAAGTGCCTTTTTATCTTAATCT | KM099175                                            |
| <i>D. rerio</i>    | <b>18S</b>     | Fw: ACCACCCACAGAATCGAGAAA<br>Rv: GCCTGCGGCTTAATTTGACT         | NR_145818                                           |
|                    | <i>ef1a</i>    | Fw: CCACGTCGACTCCGGAAA<br>Rv: CGATTCCACCGCATTGTAGA            | AY422992.1                                          |
|                    | <i>ambra1</i>  | Fw: TCTTTCGAGAAATGGCACCT<br>RV: CTCTCTGCGTTAGGGACAGG          | XM_002667669                                        |
|                    | <i>atg5</i>    | Fw: AGAGAGGCAGAACCCTACTATC<br>Rv: CCTCGTGTTCAAACCACATTC       | NM_205618                                           |
|                    | <i>beclin1</i> | Fw: GATCATGCGCAATGGTGGCTTTC<br>Rv: CCTCCTGTGTCCTCAATCTTT      | AB266448                                            |
|                    | <i>gabarap</i> | Fw: GTCTGACCTCACAGTTGGGC<br>Rv: TCCTGGTAGAGCAGTCCCAT          | NM_001013260                                        |
|                    | <i>lc3a</i>    | Fw: CAATCAGCACAGCATGG<br>Rv: GTAAAGGAAGCCGTCTTC               | NM_214739                                           |
|                    | <i>wipi1</i>   | Fw: GTGAGAGGGTAGAGAACAG<br>Rv: GTAACAACGACCCAACATC            | XM_005164002                                        |
|                    | <i>mxα</i>     | Fw: CACAGACAATCATGCCACCT<br>Rv: TTTGCAGCTCCAAAGCAGCT          | NM_182942                                           |
|                    | <i>mxε</i>     | Fw: AGTCACCCAATGTCAGTGCA<br>Rv: GCTGAGAGATGTACTGGTTC          | BC095587                                            |
|                    | <i>ifnphi1</i> | Fw: GAGCACATGAACTCGGTGAA<br>Rv: TCGTATCTTGCCACACATT           | BC162493.1                                          |
|                    | <i>ifnphi2</i> | Fw: CCTCTTTGCCAACGACAGTT<br>Rv: CGGTTCCCTTGAGCTCTCATC         | BX005440.4                                          |
|                    | <b>SVCV</b>    | <i>n-SVCV</i>                                                 | Fw: GCATTATGCCGCTCCAAGAG<br>Rv: AGCTTGCATTTGAGATCGA |
| <i>g-SVCV</i>      |                | Fw: TACAGATTCGGGGGATCTTG<br>Rv: ACCAACGTTCCATCAACACA          | NC_002803                                           |

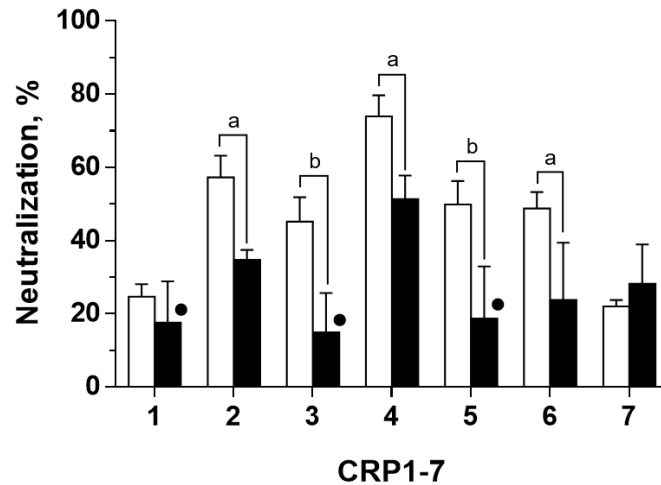

**Supplementary Figure S1. Antiviral activity of the CRP1-7-depleted supernatants.** Each CRP1-7-containing supernatant was CRP depleted by incubation with immobilized 25-HOC on ELISA plates for 2 h. Whole CRP1-7 (white bars) and depleted CRP1-7 (black bars) were incubated with EPC cells for 2 h prior to SVCV adsorption (MOI of  $10^{-2}$ ). SVCV infection was determined by the focus forming assay. The data are expressed as percentages of neutralization by the following formula:  $100 - (\text{number of fluorescent foci in the treatment group} / \text{number of fluorescent foci in the control GFP group}) \times 100$ . The data are presented as the mean and s.d. of the two independent experiments, each performed in triplicate. • indicates no significant differences between the treatment and the GFP control. Statistically significant differences are indicated as in Fig. 1. Data were analysed by using two-way ANOVA with Sidak's multiple comparisons test.

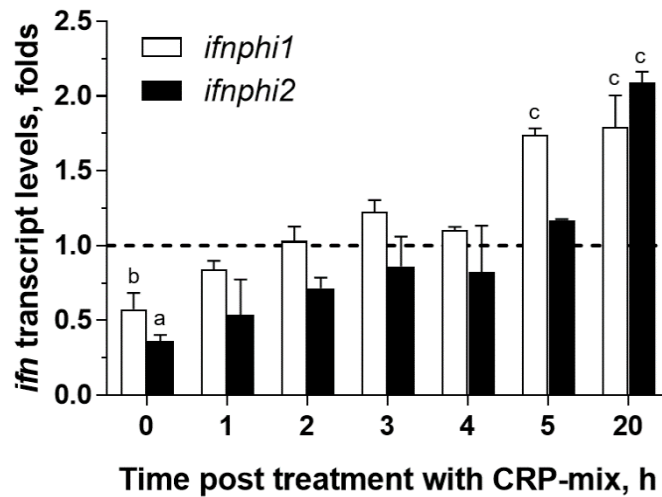

**Supplementary Figure S2. Assessment of the ability of CRP-mix to induce the transcription of *ifnphi1* and *ifnphi2* *in vitro*.** The transcript levels of *ifnphi1* and *ifnphi2* in the ZF4 cells treated with CRP-mix for 2 h prior to SVCV inoculation at different times post adsorption were quantified by RT-qPCR. The data are expressed as fold changes relative to GFP treatments by the following formula: *ifn* expression in CRP-mix-treated monolayers / *ifn* expression in GFP-treated monolayers. This experiment was performed twice in quadruplicate, and the results are presented as the mean and s.d. The statistically significant differences in comparison to the GFP-treatment group are as indicated in Fig. 1. Data were analysed by using two-way ANOVA with Sidak's multiple comparisons test.

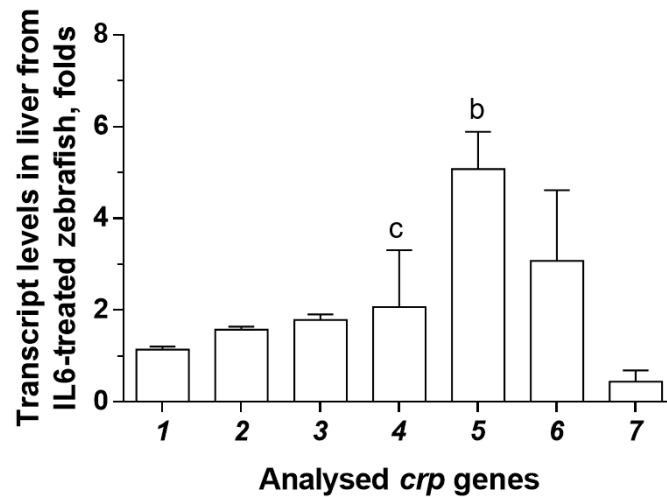

**Supplementary Figure S3. Assessment of the ability of IL-6 to induce the expression of *crp1-7* transcripts *in vivo*.** Four adult zebrafish were i.p. injected with supernatants enriched in IL-6. Two days post injection, the transcript levels of each *crp1-7* isoform from the liver were quantified by RT-qPCR and normalized to 18S ribosomal levels from the corresponding samples. The data are expressed as fold changes relative to GFP treatments by the following formula: *crp1-7* expression in the liver of zebrafish injected with IL-6 / *crp1-7* expression in the liver of zebrafish injected with GFP. The results are represented as the mean and s.d., and the statistically significant differences in comparison to the GFP-treated group are as indicated in Fig. 1. Data were analysed by multiple Student's t-tests by the Holm-Sidak method.

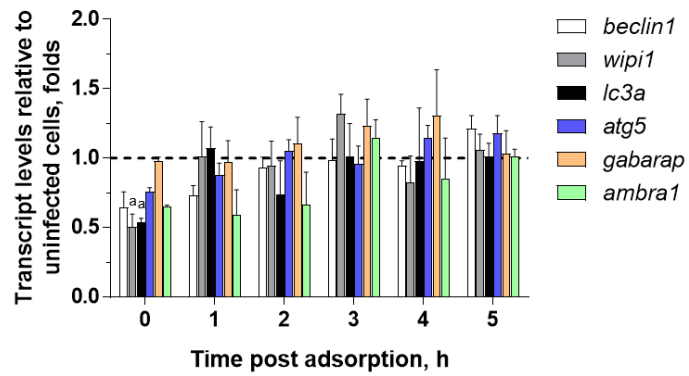

**Supplementary Figure S4. Transcriptional modulation of autophagy by SVCV in the ZF4 cells.**

The transcript levels of the genes of relevant autophagy elements (*beclin1*, *wipi1*, *lc3a*, *atg5*, *gabarap* and *ambra1*) at different times post adsorption (0-5 h) in ZF4 cells treated with GFP for 2 h prior to viral inoculation (MOI of 1) were quantified by RT-qPCR. This experiment was performed twice in quadruplicate. The data are expressed as indicated in Fig. 3 (relative to the uninfected group). The statistically significant differences in comparison to the control group are as indicated in Fig. 1. Data were analysed by two-way ANOVA with Sidak's multiple comparisons test.

**A**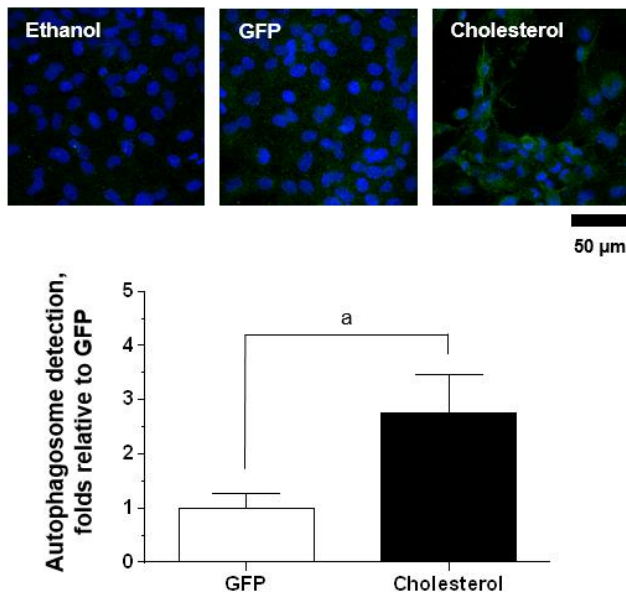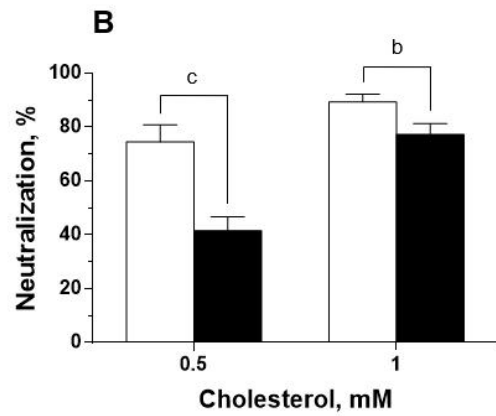

**Supplementary Figure S5. Effect of the addition of exogenous cholesterol on intracellular autophagosome levels and SVCV infection *in vitro*.** (A) Representative confocal images of FITC antibody-labelled LC3B in ZF4 cells treated with GFP and cholesterol, as well as ethanol (solvent control of both 25-HOC and cholesterol), for 4 h. Nuclei were stained with DAPI. Autophagosome levels were quantified as described in Fig. 4 and in the methods. The scale bar is equal to 50 μm. (B) Effect of cholesterol in the absence and presence of MBCD on SVCV replication *in vitro*. SVCV infectivity was assessed for EPC cells treated with cholesterol (0.5 and 1 mM) together with MBCD at either 0.5 mM (white bars) or 1 mM (black bars) for 2 h before infection. SVCV infection was determined by the focus forming assay. The results are represented as percentages of neutralization relative to the untreated group. This experiment was performed 3 times in triplicate. Statistically significant differences between cholesterol treatments with and without MBCD are indicated as in Fig. 1. Data were analysed by using two-tailed unpaired Student's t-test.
